# Supplementary material for: Atomic Fe–N5 catalytic sites embedded in N-doped carbon as a highly efficient oxygen electrocatalyst for zinc–air batteries
Source: Royal Society of Chemistry journal article supplement (doi:10.1039/d1qm00809a), 2021-01-01
Supplement: d1qm00809a1.pdf [file d1qm00809a1.pdf]

Supplementary information for

**Atomic Fe–N<sub>5</sub> Catalytic Site Embedded in N-doped Carbon as Highly  
Efficient Oxygen Electrocatalyst for Zinc–Air Batteries**

Huinian Zhang\*, Suping Jia, Xiaolin Shi, Ziyuan Li, Bin Liu, Ning Li, Ying Li,  
Shengliang Hu and Huiqi Wang\*

*School of Energy and Power Engineering, North University of China, Taiyuan 030051,  
P. R. China.*

E-mail: [zhanghuinian123@163.com](mailto:zhanghuinian123@163.com) (Huinian Zhang);

[hqiwang@163.com](mailto:hqiwang@163.com) (Huiqi Wang)

**ABSTRACT**

Atomically dispersed transition metal–N<sub>x</sub>–C-based catalysts with abundant Fe–N<sub>x</sub> active sites have demonstrated good prospects for oxygen-reduction reaction (ORR) and are promising alternatives to Pt-based electrocatalysts. However, further improving their ORR activity by precise modulation of the Fe–N<sub>x</sub> site structure remains challenging. Herein, we synthesize a single-iron-atom electrocatalyst embedded in N-doped carbon with active and robust five-coordinated Fe–N<sub>5</sub> moieties by a simple synthetic approach. The FeN<sub>5</sub>-C/G catalyst is obtained through prolonged calcination of melamine and hemin co-adsorbed on oxide graphene. The catalyst exhibits an enhanced ORR activity in alkaline mediums with an admirable half-wave potential of 0.84 V, outperforming FeN<sub>4</sub>-C, which has four-coordinated Fe–N<sub>4</sub> moieties. Zn–air batteries with FeN<sub>5</sub>-C/G air cathode further demonstrates excellent ORR performance and stability of the catalyst, outperforming the commercial Pt/C catalyst. The remarkable ORR performance demonstrates the significant roles of mono-dispersed

FeN<sub>5</sub> active sites embedded in N-doped carbon, in which N-doped graphene supplies enough N sites to axially coordinate with FeN<sub>4</sub>.

## Keywords

single-atom electrocatalyst, Fe–N<sub>5</sub> active site, oxygen reduction reaction, hemin, Zn–air battery

## Additional Figures

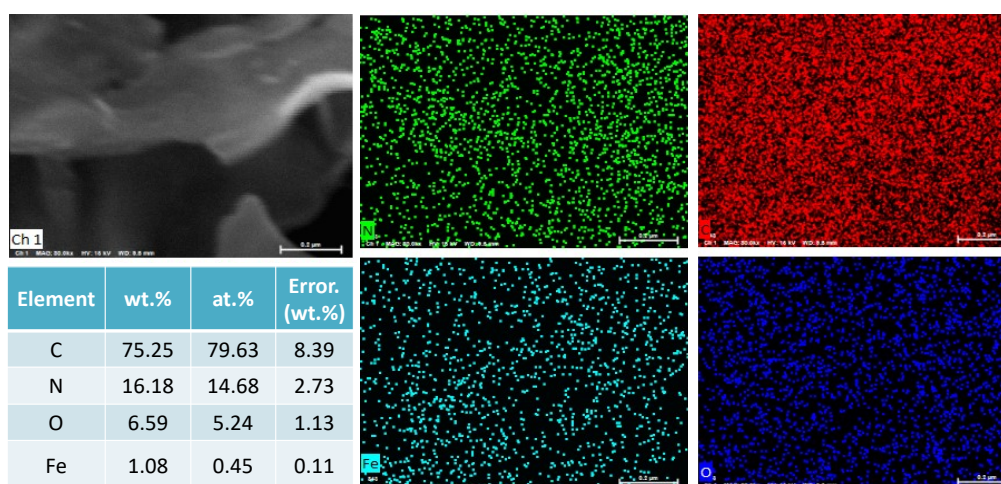

**Figure S1** SEM, EDS and correspondingly quantified elemental percentage of the FeN<sub>5</sub>-C/G catalyst.

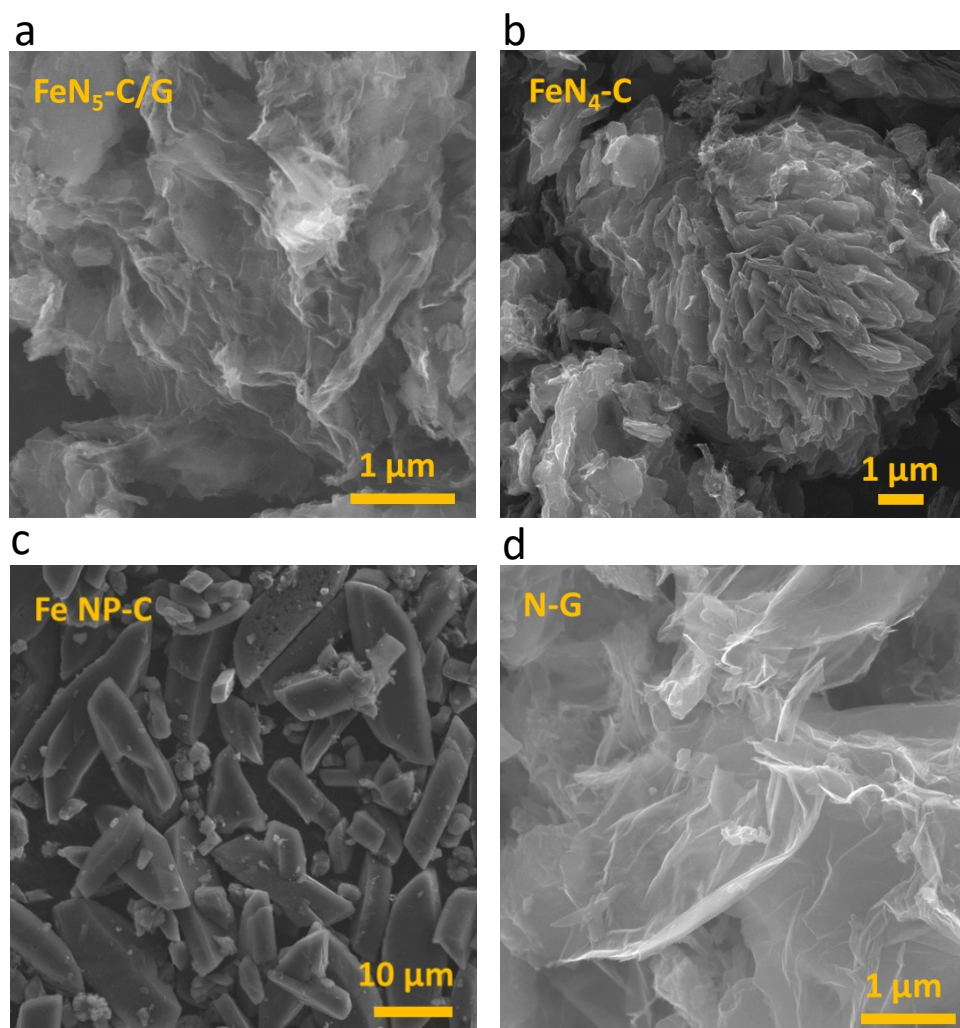

**Figure S2** SEM images of different catalysts: (a) FeN<sub>5</sub>-C/G catalyst, (b) FeN<sub>4</sub>-C catalyst, (c) Fe NP-C catalyst and (d) N-G catalyst.

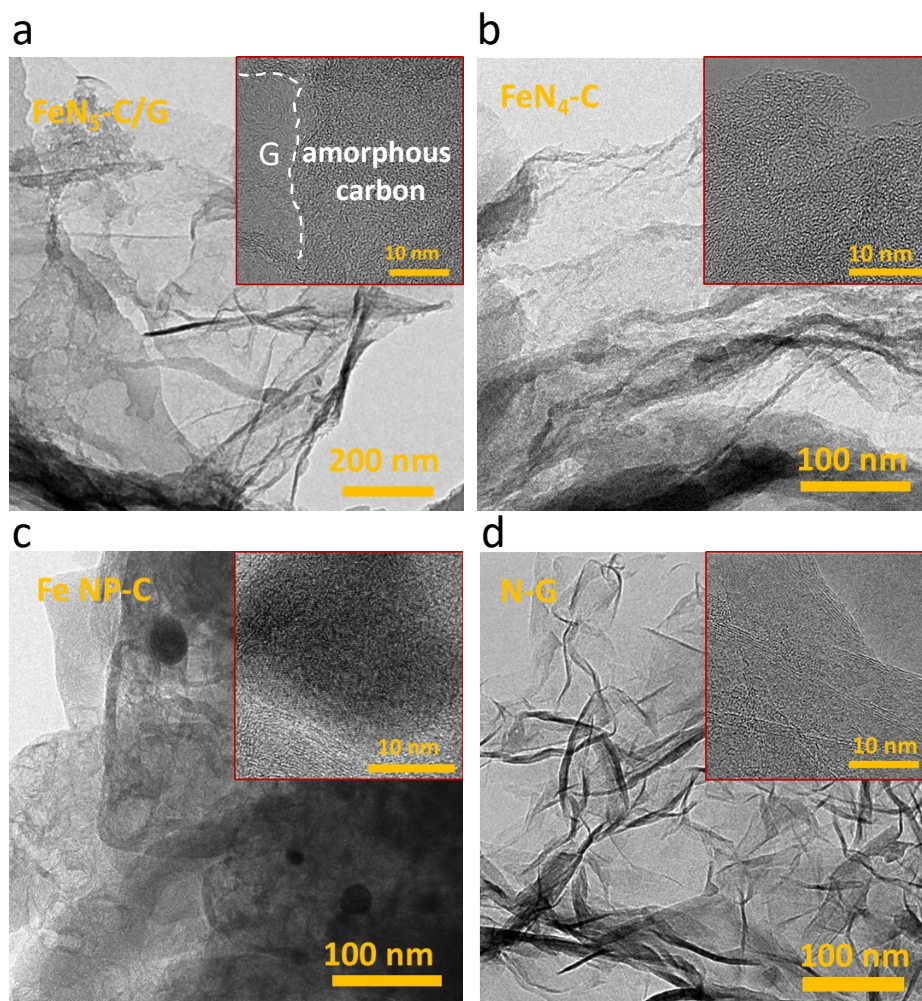

**Figure S3** TEM (inset: HR-TEM) images of different catalysts: (a)  $\text{FeN}_5\text{-C/G}$  catalyst, (b)  $\text{FeN}_4\text{-C}$  catalyst, (c) Fe NP-C catalyst and (d) N-G catalyst.

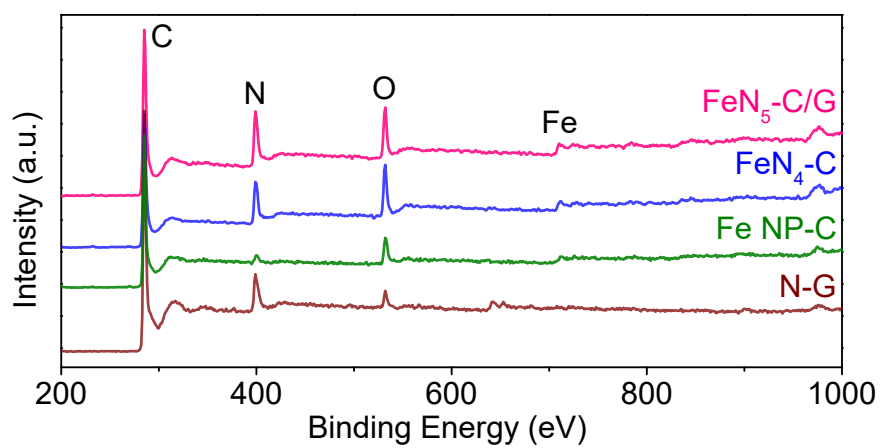

**Figure S4** XPS full spectra of  $\text{FeN}_5\text{-C/G}$  catalyst compared to  $\text{FeN}_4\text{-C}$ , N-G and Fe NP-C.

**Table S1** Atomic ratios (at. %) of O, Fe, N and C elements in FeN<sub>5</sub>-C/G, FeN<sub>4</sub>-C, N-G and Fe NP-C catalysts based on XPS analysis.

| Sample                | C content (at%) | N content (at%) | Fe content (at%) | O content (at%) |
|-----------------------|-----------------|-----------------|------------------|-----------------|
| N-G                   | 86.08%          | 11.47%          | -                | 2.45%           |
| FeN <sub>5</sub> -C/G | 74.11%          | 15.86%          | 1.40%            | 8.63%           |
| FeN <sub>4</sub> -C   | 71.78%          | 16.02%          | 1.24%            | 10.97%          |
| Fe NP-C               | 86.80%          | 5.37%           | 0.59%            | 7.24%           |

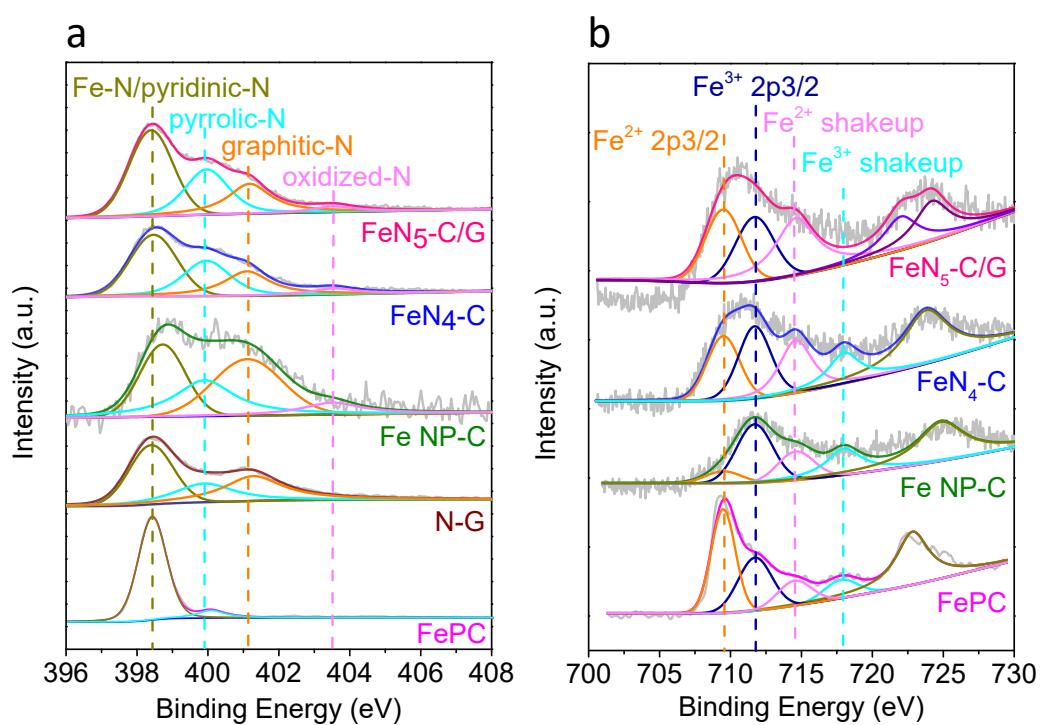

**Figure S5** XPS spectra of FeN<sub>5</sub>-C/G catalyst compared with control samples. (a) XPS spectra of N1s peaks with the deconvolution, (b) XPS spectra of Fe2p peaks with the deconvolution.

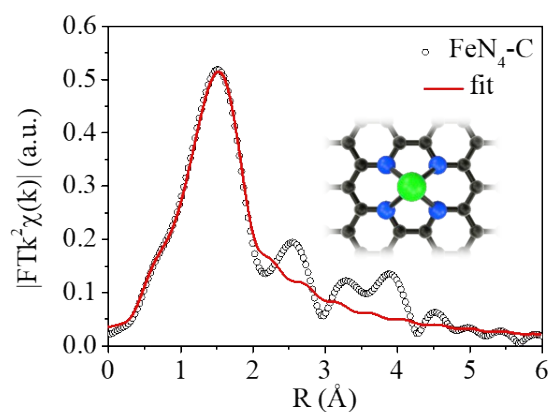

**Figure S6** EXAFS-fitting curves at R space of FeN<sub>4</sub>-C with Fe-N<sub>4</sub> model.

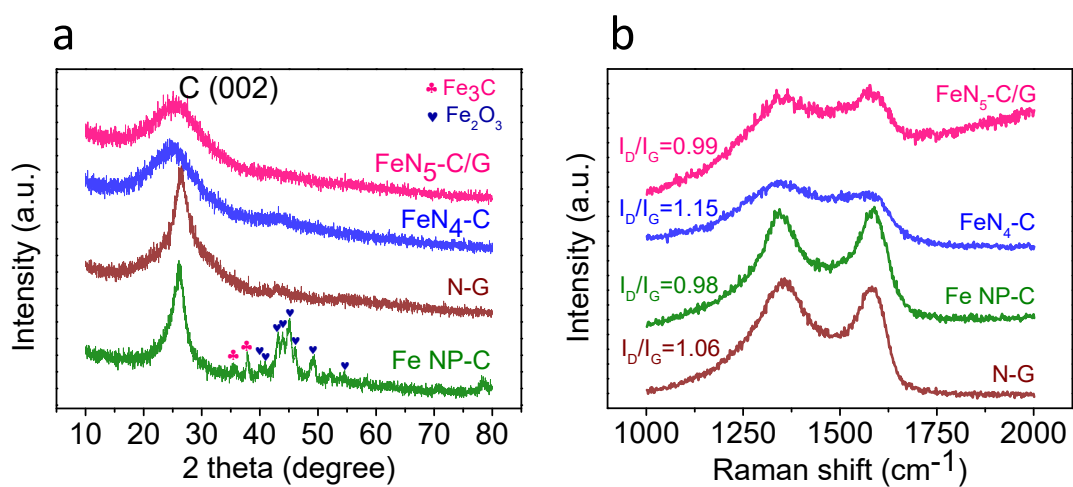

**Figure S7** (a) XRD spectra and (b) Raman spectra of FeN<sub>5</sub>-C/G compared with FeN<sub>4</sub>-C, Fe NP-C and N-G samples.



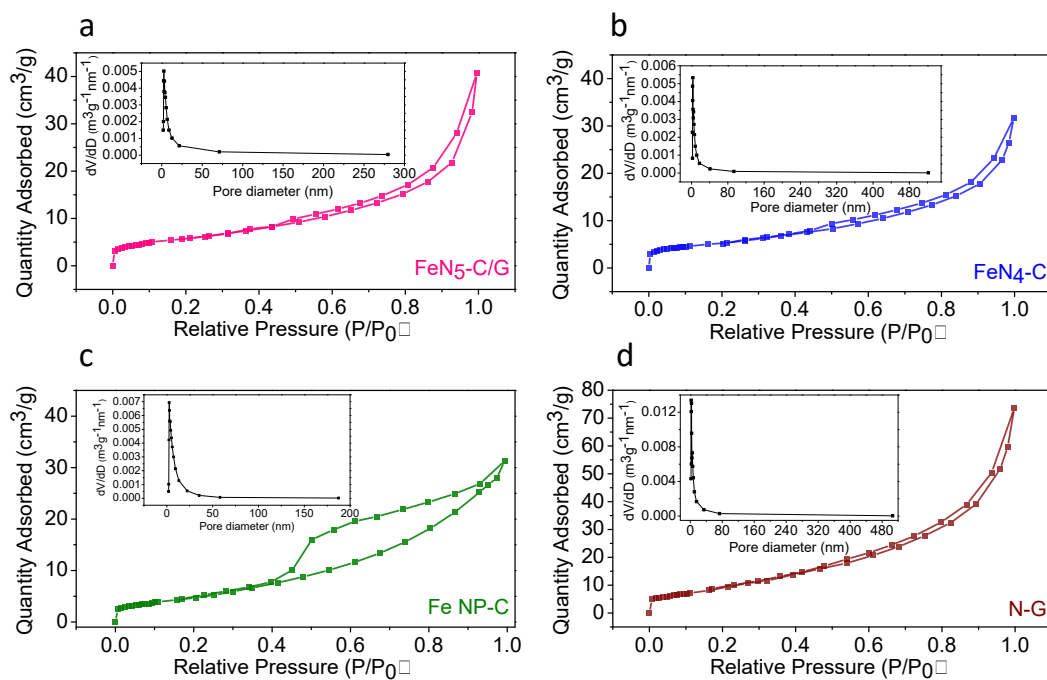

**Figure S8**  $N_2$  adsorption-desorption isotherm (inset: pore size distribution) of FeN<sub>5</sub>-C/G compared with FeN<sub>4</sub>-C, N-G and Fe NP-C catalysts.

**Table S2** The size and volume distribution of the pores for the FeN<sub>5</sub>-C/G catalyst compared with FeN<sub>4</sub>-C, N-G and Fe NP-C catalysts.

| Sample                | $S_{BET}$<br>( $m^2/g$ ) | $V_{total}$<br>( $cm^3/g$ ) | $V_{meso}$<br>( $cm^3/g$ ) | $V_{micro}$<br>( $cm^3/g$ ) | $V_{micro}/V_{total}$ | D (nm) |
|-----------------------|--------------------------|-----------------------------|----------------------------|-----------------------------|-----------------------|--------|
| FeN <sub>5</sub> -C/G | 21                       | 0.063                       | 0.0552                     | 0.0078                      | 12%                   | 12.046 |
| FeN <sub>4</sub> -C   | 19                       | 0.049                       | 0.0418                     | 0.0072                      | 15%                   | 10.398 |
| N-G                   | 36                       | 0.114                       | 0.1029                     | 0.0111                      | 9.7%                  | 12.607 |
| Fe NP-C               | 18                       | 0.048                       | 0.0419                     | 0.0061                      | 13%                   | 10.873 |

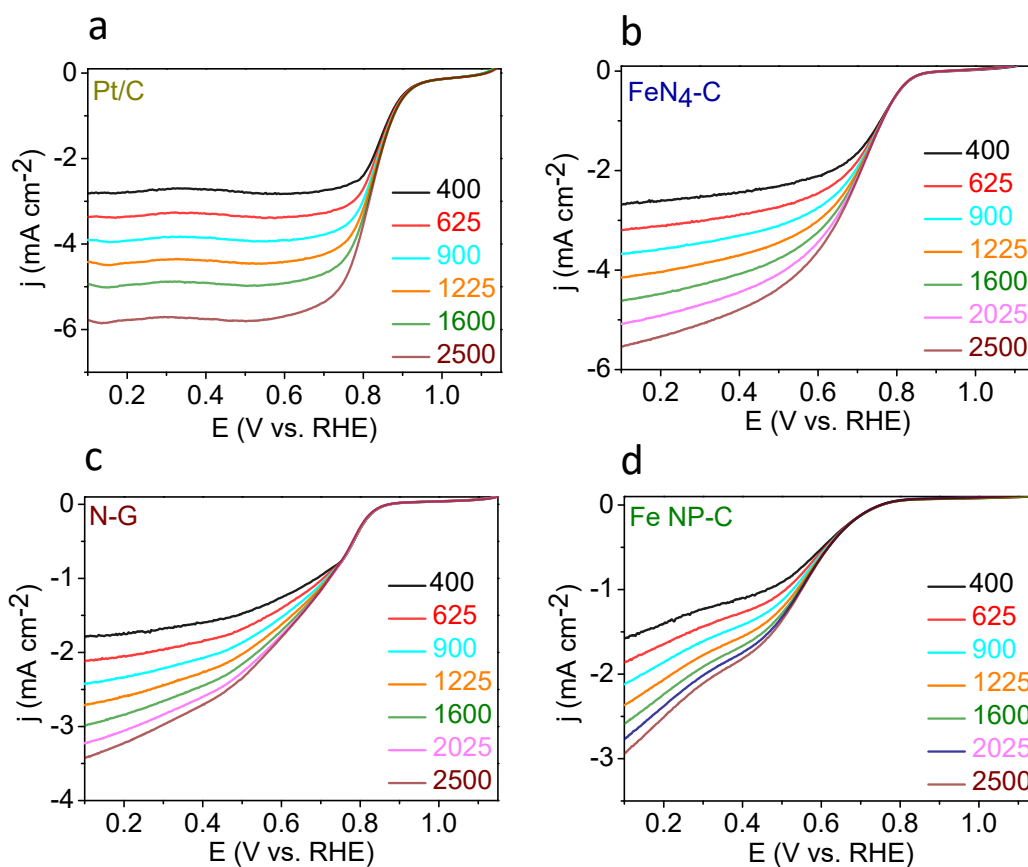

**Figure S9** LSV curves of various catalysts with various rotation rates (a) Pt/C, (b) FeN<sub>4</sub>-C, (c) N-G and (d) Fe NP-C.

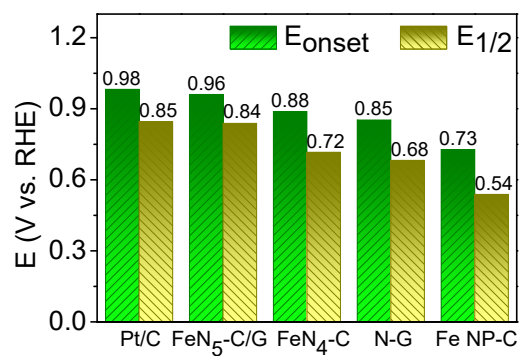

**Figure S10** Onset potentials ( $E_{\text{onset}}$ ) and half-wave potentials ( $E_{1/2}$ ) of Pt/C, FeN<sub>5</sub>-C/G, FeN<sub>4</sub>-C, N-G and Fe NP-C catalysts.



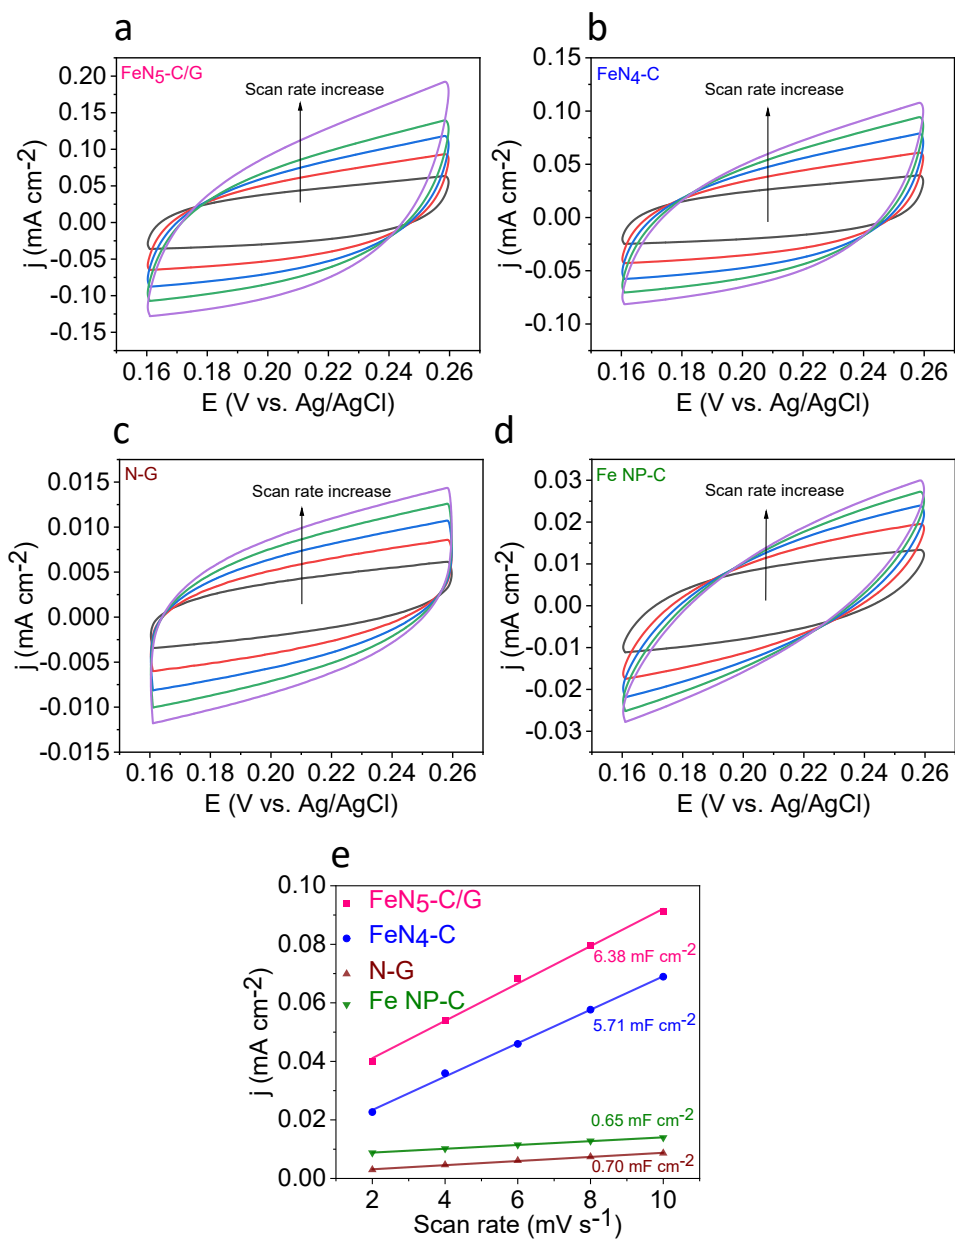

**Figure S11** CV curves at different scan rates (2, 4, 6, 8, 10 mV/s) of (a) FeN<sub>5</sub>-C/G and (b) FeN<sub>4</sub>-C, (c) N-G, (d) Fe NP-C. (e)  $C_{dl}$  calculations of FeN<sub>5</sub>-C/G and FeN<sub>4</sub>-C.

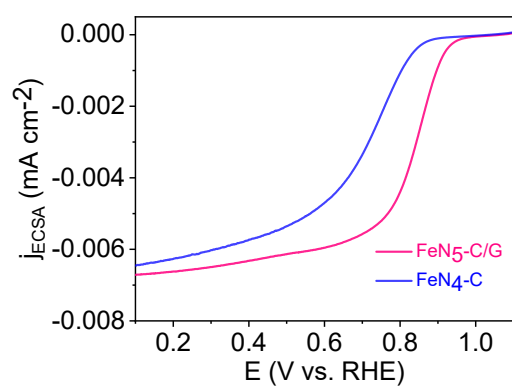

**Figure S12** ECSA normalized LSV curves of FeN<sub>5</sub>-C/G and FeN<sub>4</sub>-C.
